# Supplementary material for: Home Respiratory Polygraphy and Spirometry in Normal Weight and Children with Obesity Suspected for Obstructive Sleep Apnea Syndrome: Are There Any Associations?
Source: Hindawi journal article supplement (doi:10.1155/2023/1532443), 2023-01-31

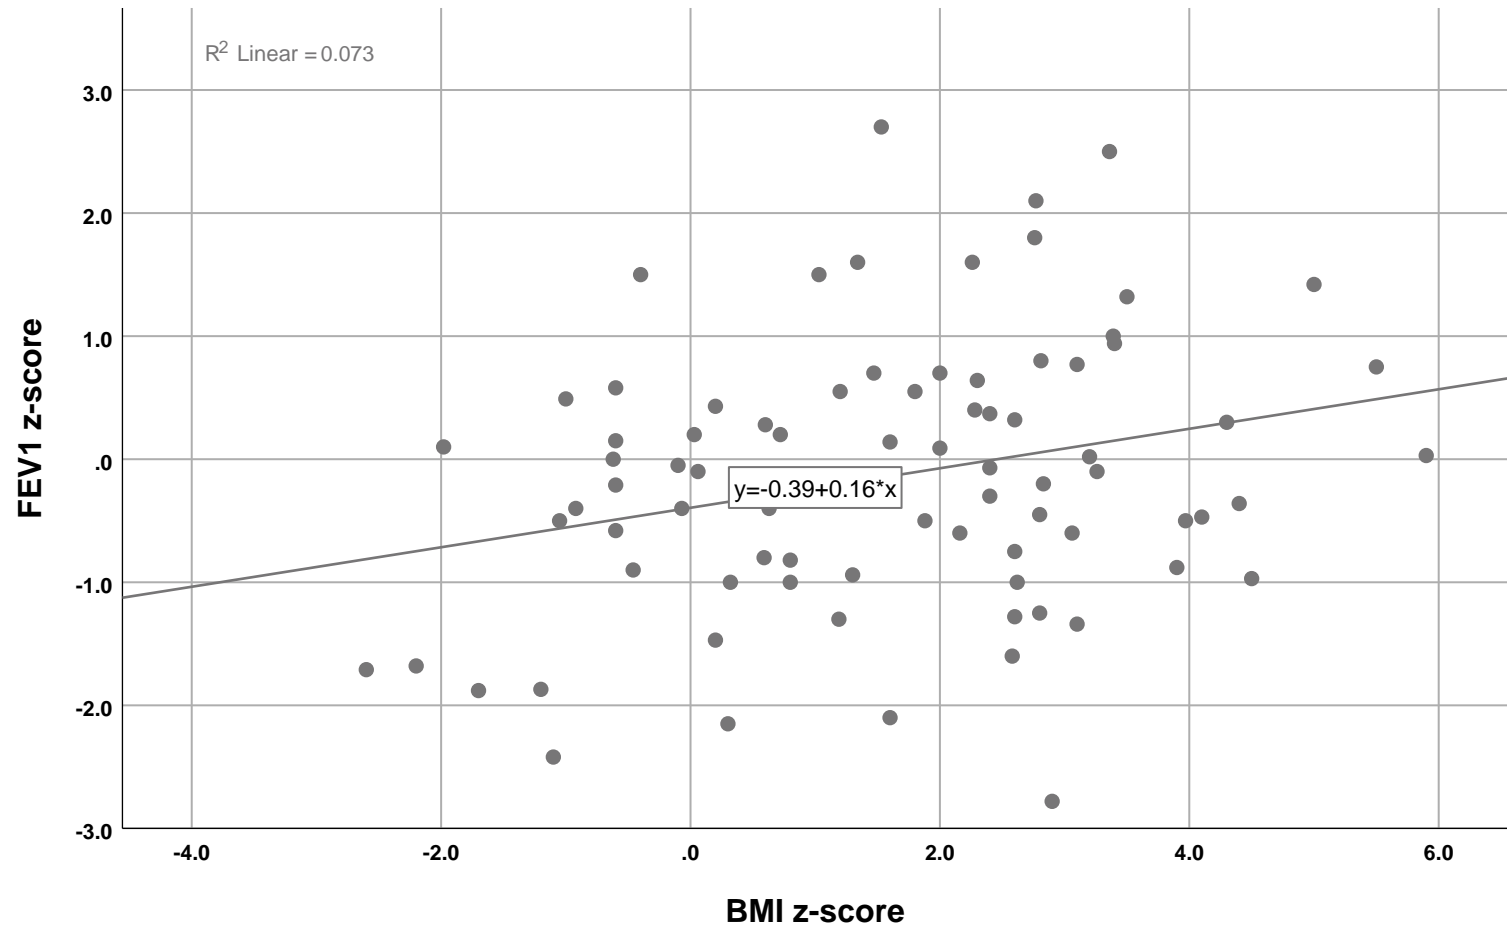

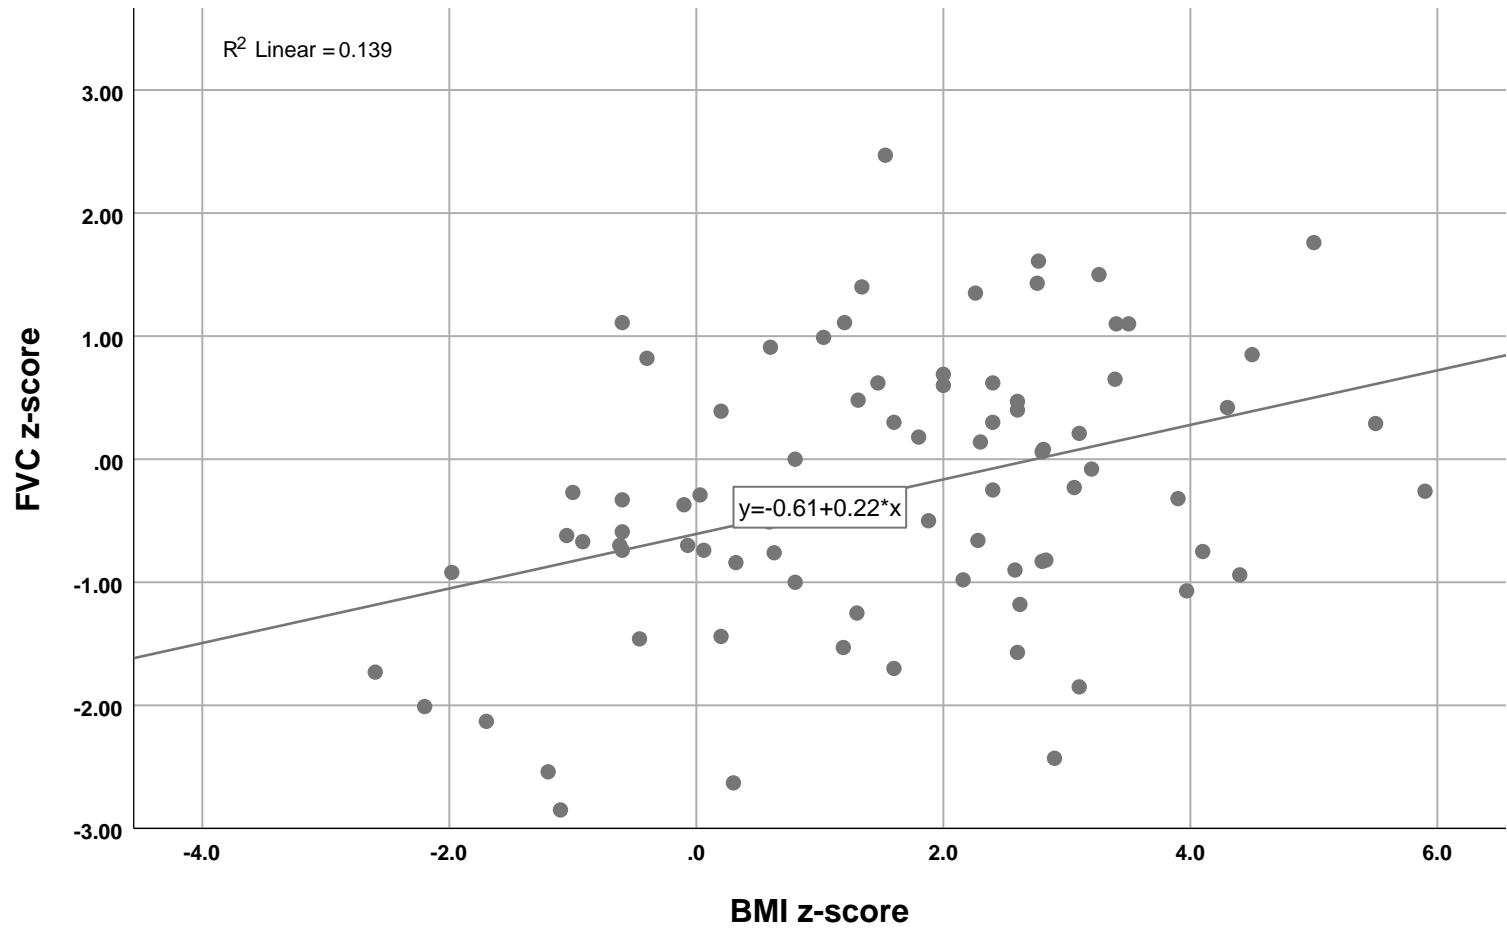

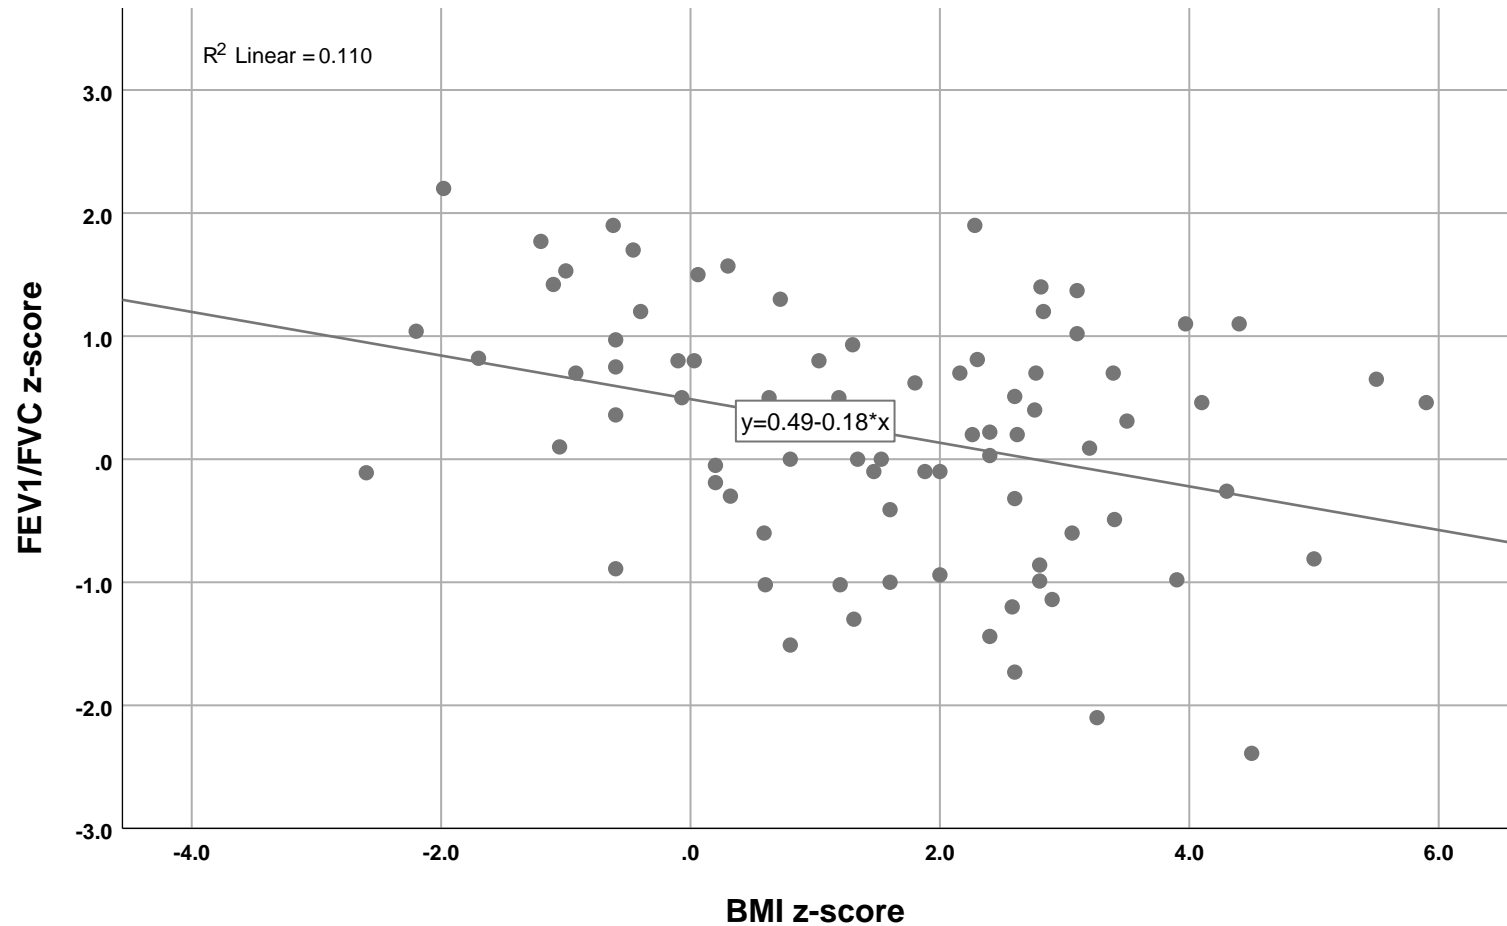

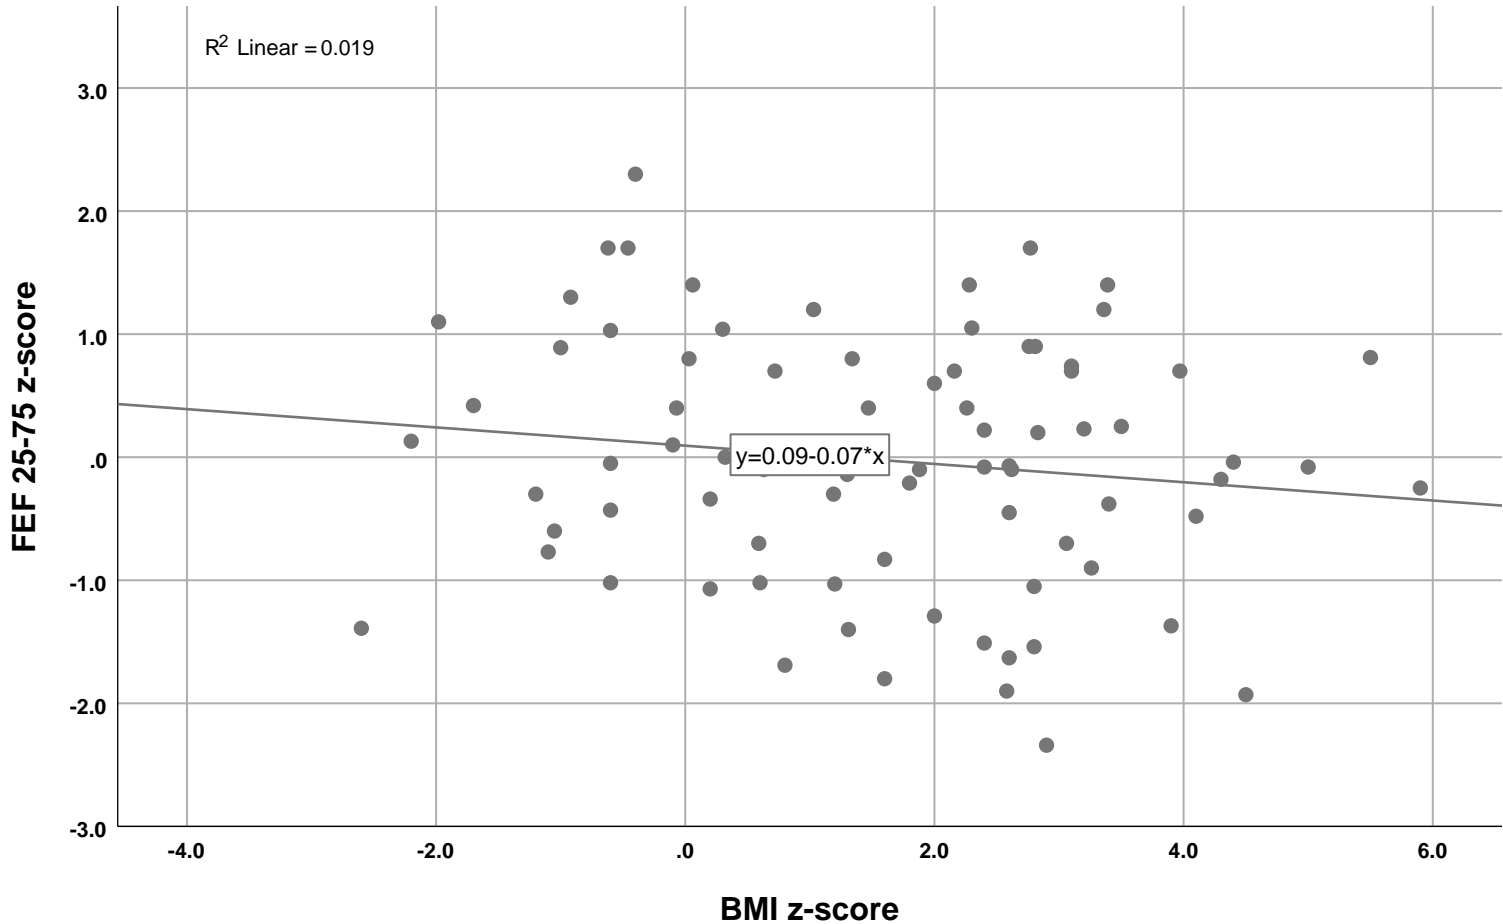

Supplement: f1 [file 1532443.f1.pdf]
